# Supplementary material for: Mutational networks of escape from transmitted HIV-1 infection
Source: PubMed Central journal article supplement (PMC7721145; doi:10.1371/journal.pone.0243391), 2020-12-07
Supplement: pone.0243391.s001.pdf [file pone.0243391.s001.pdf]

# Mutational networks of escape from transmitted HIV-1 infection

Elma H. Akand<sup>1</sup>, Stephen J. Maher<sup>2</sup>, John M. Murray<sup>1,\*</sup>

<sup>1</sup> School of Mathematics and Statistics, UNSW Sydney, NSW 2052, Australia

<sup>2</sup> College of Engineering, Mathematical and Physical Sciences, University of Exeter, Exeter EX4 4QF, United Kingdom

\* Email: j.murray@unsw.edu.au

**Supplementary table 1. The coevolving pairs determined on founder B that appeared in at least 10% of the 226 optimal solutions.**

| AA1 position | AA2 position | AA pairs | Interacting domains | Num. of observed solutions | Num. of sequences | S value |
|--------------|--------------|----------|---------------------|----------------------------|-------------------|---------|
| 278          | 620          | Ser-Asp  | C2-gp41             | 222                        | 15                | 0.19    |
| 553          | 624          | Ser-Asn  | gp41-gp41           | 198                        | 8                 | 0.57    |
| 147          | 467d         | Lys-Glu  | V1/V2-V5            | 197                        | 11                | 0.18    |
| 300          | 624          | Asn-Glu  | V3-gp41             | 176                        | 10                | 0.38    |
| 758          | 762          | Val-Asn  | gp41-gp41           | 172                        | 11                | 0.18    |
| 724          | 747          | Arg-Arg  | gp41-gp41           | 134                        | 12                | 0.44    |
| 464          | 779          | Asp-Thr  | V5-gp41             | 101                        | 8                 | 0.23    |
| 640          | 832          | Asn-Ile  | gp41-gp41           | 89                         | 5                 | 0.38    |
| 32           | 464          | Glu-Asp  | C1-V5               | 84                         | 8                 | 0.45    |
| 336          | 851          | Glu-Leu  | C3-gp41             | 71                         | 10                | 0.19    |
| 335          | 612          | Lys-Thr  | C3-gp41             | 64                         | 7                 | 0.31    |
| 154          | 318          | Met-Phe  | V1/V2-V3            | 56                         | 6                 | 0.24    |
| 543          | 677          | Leu-Gln  | gp41-gp41           | 49                         | 6                 | 0.09    |
| 24           | 415          | Ile-Ile  | C1-V4               | 47                         | 8                 | 0.74    |
| 419          | 624          | Lys-Asp  | C4-gp41             | 36                         | 5                 | 0.06    |
| 750          | 836          | Asp-Ile  | gp41-gp41           | 32                         | 14                | 0.61    |
| 144h         | 624          | Asn-Asn  | V1/V2-gp41          | 32                         | 5                 | 0.16    |
| 640          | 837          | Asn-Phe  | gp41-gp41           | 31                         | 8                 | 0.42    |
| 32           | 290          | Asp-Lys  | C1-C2               | 30                         | 4                 | 0.19    |
| 290          | 515          | Lys-Leu  | C2-gp41             | 30                         | 5                 | 1.58    |
| 419          | 607          | Lys-Thr  | C4-gp41             | 28                         | 6                 | 0.11    |
| 588          | 836          | Lys-Thr  | gp41-gp41           | 27                         | 5                 | 1.11    |
| 462          | 640          | Asn-Asn  | V5-gp41             | 24                         | 6                 | 0.45    |

**Supplementary table 2. All 35 coevolving pairs contained in the 125 optimal chronic B solutions.**

| AA1 position | AA2 position | AA pairs | Interacting domains | Num. of observed solutions | Num. of sequences | S value |
|--------------|--------------|----------|---------------------|----------------------------|-------------------|---------|
| 149          | 187          | Met-Thr  | V1/V2-V1/V2         | 125                        | 17                | 0.58    |
| 137          | 624          | Thr-Asp  | V1/V2-gp41          | 119                        | 4                 | 0.69    |
| 350          | 621          | Lys-Gln  | C3-gp41             | 119                        | 7                 | 0.43    |
| 426          | 624          | Arg-Asp  | C4-gp41             | 119                        | 7                 | 0.41    |
| 188          | 743          | Thr-Gly  | V1/V2- gp41         | 119                        | 7                 | 0.13    |
| 337          | 535          | Gln-Val  | C3-gp41             | 119                        | 8                 | 0.72    |
| 187          | 240          | Thr-Lys  | V1/V2-C2            | 119                        | 9                 | 0.54    |
| 360          | 677          | Ala-Asn  | C3-gp41             | 80                         | 8                 | 0.18    |
| 7            | 621          | Cys-Gln  | C1-gp41             | 76                         | 13                | 0.53    |
| 360          | 747          | Ala-Pro  | C3- gp41            | 45                         | 6                 | 0.43    |
| 7            | 275          | Cys-Ala  | C1-C2               | 43                         | 8                 | 0.32    |
| 355          | 375          | Asn-Ser  | C3-C3               | 26                         | 11                | 0.17    |
| 330          | 355          | His-Asn  | V3-C3               | 26                         | 12                | 0.21    |
| 171          | 355          | Lys-Asn  | V1/V2-C3            | 24                         | 10                | 0.23    |
| 183          | 355          | Pro-Asn  | V1/V2-C3            | 21                         | 9                 | 0.13    |
| 271          | 306          | Val-Arg  | C2-V3               | 20                         | 9                 | 0.27    |
| 167          | 306          | Asp-Arg  | V1/V2-V3            | 20                         | 9                 | 0.10    |
| 306          | 500          | Arg-Lys  | V3-C5               | 20                         | 9                 | 0.62    |
| 306          | 394          | Arg-Thr  | V3-V4               | 20                         | 10                | 0.19    |
| 272          | 355          | Ile-Asn  | C2-C3               | 15                         | 11                | 0.12    |
| 133          | 355          | Asp-Asn  | V1/V2-C3            | 13                         | 10                | 0.11    |
| 10           | 306          | Leu-Arg  | C1-V3               | 10                         | 7                 | 0.16    |
| 306          | 375          | Arg-Ser  | V3-C3               | 10                         | 9                 | 0.28    |
| 306          | 619          | Arg-Leu  | V3-gp41             | 10                         | 9                 | 0.07    |
| 5a           | 405          | Thr-Glu  | C1-V4               | 6                          | 4                 | 0.20    |
| 398          | 683          | Ser-Arg  | V4-gp41             | 6                          | 6                 | 0.16    |
| 636          | 747          | Glu-Pro  | gp41- gp41          | 6                          | 7                 | 0.48    |
| 620          | 677          | Asn-Lys  | gp41-gp41           | 6                          | 7                 | 0.49    |
| 269          | 306          | Glu-Arg  | C2-V3               | 6                          | 8                 | 0.41    |
| 10           | 621          | Trp-Gln  | C1-gp41             | 6                          | 10                | 0.27    |
| 187          | 624          | Thr-Asp  | V1/V2-gp41          | 6                          | 13                | 0.54    |
| 149          | 412          | Met-Ile  | V1/V2-V4            | 6                          | 17                | 0.17    |
| 4            | 701          | Lys-Ile  | C1- gp41            | 3                          | 5                 | 0.07    |

|     |     |         |         |   |   |      |
|-----|-----|---------|---------|---|---|------|
| 463 | 701 | Asn-Ile | V5-gp41 | 3 | 5 | 0.06 |
| 306 | 723 | Arg-Ala | V3-gp41 | 3 | 6 | 0.12 |

**Supplementary table 3. Features appearing in at least 20 of the 134 solutions for founder C sequences.**

| AA1 position | AA2 position | AA pairs | Interacting domains | Num. of observed solutions | Num. of sequences | S value |
|--------------|--------------|----------|---------------------|----------------------------|-------------------|---------|
| 166          | 305          | Lys-Lys  | V1/V2-V3            | 74                         | 11                | 0.13    |
| 414          | 837          | Ile-Cys  | V4-gp41             | 71                         | 14                | 0.15    |
| 644          | 781          | Lys-Ala  | gp41-gp41           | 49                         | 9                 | 0.61    |
| 518          | 818          | Val-Thr  | gp41-gp41           | 47                         | 9                 | 0.16    |
| 97           | 171          | Glu-Lys  | C1-V1/V2            | 42                         | 6                 | 0.14    |
| 640          | 778          | Asn-Val  | gp41-gp41           | 42                         | 10                | 0.43    |
| 448          | 821          | Ser-Ala  | C4-gp41             | 35                         | 8                 | 0.24    |
| 170          | 624          | Gln-Glu  | V1/V2-gp41          | 33                         | 6                 | 0.81    |
| 185c         | 519          | Asn-Phe  | V1/V2-gp41          | 32                         | 9                 | 0.10    |
| 5a           | 413          | Thr-Thr  | C1-V4               | 30                         | 6                 | 0.21    |
| 143m         | 318          | Ser-Tyr  | V1/V2-V3            | 29                         | 7                 | 0.17    |
| 335          | 467f         | Lys-Thr  | C3-V5               | 25                         | 7                 | 0.40    |
| 292          | 393          | Ile-Ser  | C2-V4               | 22                         | 5                 | 0.13    |
| 339          | 833          | Asn-Leu  | C3-gp41             | 20                         | 6                 | 0.35    |

**Supplementary table 4. Features appearing in at least 400 of the 2097 optimal solutions for chronic C sequences.**

| AA1 position | AA2 position | AA pairs | Interacting domains | Num. of observed solutions | Num. of sequences | S value |
|--------------|--------------|----------|---------------------|----------------------------|-------------------|---------|
| 32           | 419          | Glu-Arg  | C1-C4               | 2048                       | 9                 | 0.11    |
| 240          | 448          | His-Asn  | C2-C4               | 2010                       | 8                 | 0.14    |
| 4            | 462          | Met-Gly  | C1-V5               | 1909                       | 8                 | 0.64    |
| 414          | 779          | Thr-Ala  | V4- gp41            | 1898                       | 10                | 0.06    |
| 84           | 500          | Ile-Gly  | C1-C5               | 1805                       | 6                 | 1.12    |
| 137          | 456          | Thr-Arg  | V1/V2-C4            | 541                        | 6                 | 0.16    |
| 137          | 668          | Thr-Asn  | V1/V2-gp41          | 537                        | 6                 | 0.29    |
| 333          | 787          | Ile-Gln  | C3- gp41            | 444                        | 7                 | 0.07    |

|     |     |         |             |     |   |      |
|-----|-----|---------|-------------|-----|---|------|
| 166 | 787 | Arg-Gln | V1/V2- gp41 | 444 | 8 | 0.21 |
| 211 | 787 | Asp-Gln | C2- gp41    | 444 | 8 | 0.05 |
| 787 | 805 | Gln-Leu | gp41- gp41  | 444 | 8 | 0.11 |
| 137 | 535 | Thr-Ile | V1/V2-gp41  | 411 | 5 | 0.20 |
| 137 | 833 | Thr-Ile | V1/V2- gp41 | 411 | 5 | 0.29 |

**Supplementary table 5. List of coevolving pairs identified within 8 Å of each other.**

| AA1 position | AA2 position | Min. distance | Optimal Network |
|--------------|--------------|---------------|-----------------|
| A137         | T138         | 3.7           | Chronic C       |
| A821         | T822         | 3.8           | Chronic C       |
| D337         | N339         | 5.2           | Chronic C       |
| D185         | N190k        | 6.1           | Chronic C       |
| L833         | C837         | 5.9           | Founder C       |
| I277         | A281         | 5.9           | Founder C       |
| E295         | N334         | 7.7           | Founder C       |
| A133a        | S138         | 7.9           | Founder C       |
| S163         | G164         | 3.8           | Founder B       |
| S163         | V169         | 5.2           | Founder B       |
| V758         | N762         | 5.9           | Founder B       |
| N144h        | M154         | 6.0           | Founder B       |
| S144m        | M154         | 5.9           | Founder B       |

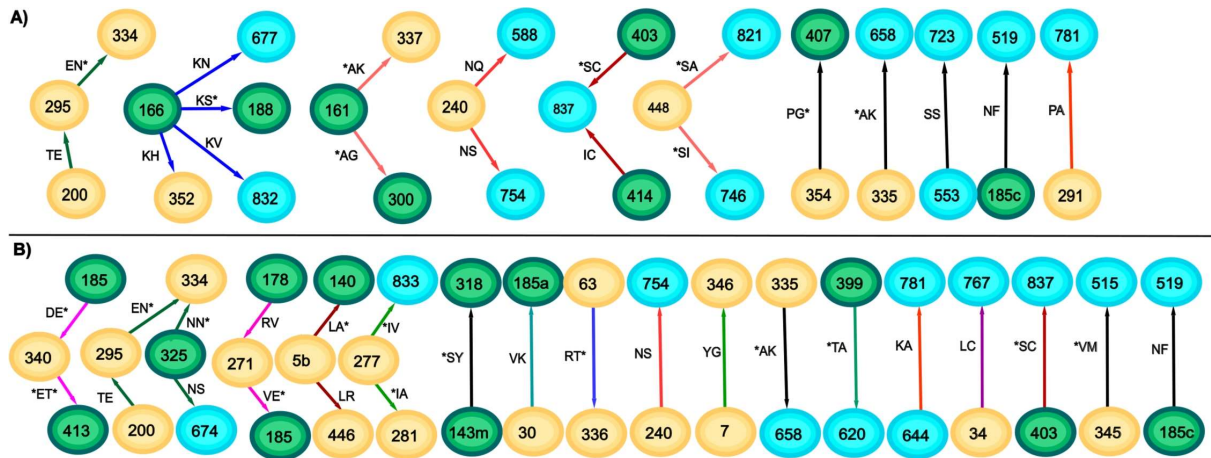

**Supplementary Figure 1. Optimal features expressed by typical founder subtype C sequences.** Sequences were chosen that contained the median (A) and maximum (B) number of separate components for each group.

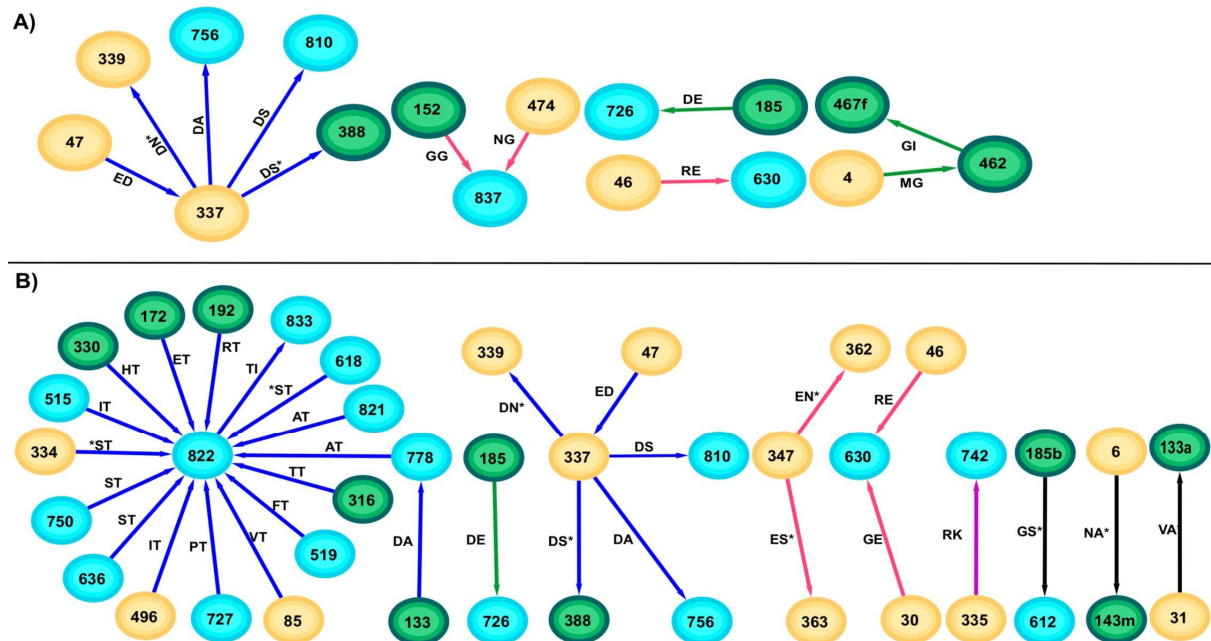

**Supplementary Figure 2. Optimal features expressed by typical chronic subtype C sequences.** Sequences were chosen that contained the median (A) and maximum (B) number of separate components for each group.
